# Supplementary material
Source: HighWire-hosted journal article supplement (https://gut.bmj.com/content/gutjnl-2022-328256)
Supplement: inline-supplementary-material-3 [file inline-supplementary-material-3.xlsx]

## Sheet: Table S1
Table S1. External validation cohorts used in this study.
Study	Status	No. of samples
Kartal_DE 2022	PC	44
Kartal_DE 2022	CTR	32
Kartal_ES 2022	PC	57
Kartal_ES 2022	CTR	50
Kartal_ES 2022	Pancreatitis	29
Nagata_JP 2022	PC	43
Nagata_JP 2022	CTR	235
Price Lloyd 2016	CD	151
Price Lloyd 2016	UC	84
Price Lloyd 2016	CTR	65
Buschart 2016	T1D	10
Buschart 2016	CTR	8
Dhakan 2019	CTR	110
Feng 2015	CRC	93
Feng 2015	CTR	63
Brito 2016	CTR	172
Franzosa 2018	CD	88
Franzosa 2018	UC	76
Franzosa 2018	CTR	56
He 2017	CD	49
He 2017	CTR	54
Hoyles 2018	NAFLD	73
Jie 2017	CTR	171
Jie 2017	ACD	214
Karlsson 2013	T2D	102
Karlsson 2013	CTR	43
Kuang 2019	T1D	29
Kuang 2019	CTR	59
Liu 2016	CTR	110
Forslund 2015	CTR	373
Forslund 2015	T2D	78
Forslund 2015	T1D	31
Forslund 2015	CD	86
Forslund 2015	UC	192
Qin 2012	CTR	185
Qin 2012	T2D	183
Sankaranarayanan 2015	T2D	19
Schirmer 2016	CTR	471
Vogtmann 2016	CTR	52
Vogtmann 2016	CRC	52
Wirbel 2019	CTR	60
Wirbel 2019	CRC	60
Yachida 2019	CRC	352
Yachida 2019	CTR	289
Yu 2017	CRC	74
Yu 2017	CTR	54
Zeevi 2015	CTR	900
Zeller 2014	CTR	83
Zeller 2014	ADA	15
Zeller 2014	CRC	49
Zhu 2018	BRCA	62
Zhu 2018	CTR	71
Xie 2016	CTR	250
Qin 2014	CTR	114
Qin 2014	LD	116
Abbreviations: ACD, atherosclerotic coronary disease; ADA, American diabetes; BRCA, breast cancer; CD, Crohn’s disease; CRC, colorectal cancer; CTR, controls; LD, liver disease; NAFLD, non-alcoholic fatty liver disease; PC, pancreatic cancer; T1D, type 1 diabetes; T2D, type 2 diabetes; UC, ulcerative colitis; DE, German; ES, Spanish, JP, Japan.

## Sheet: Table S2
Table S2. Overlaps between the biomarker species shown in Figure 1C and the top features of the disease-stratification classifiers for selected cohorts.
Species	NKTCL	Kartal_ES 2022_PC	Kartal_DE 2022_PC	Nagata_JP 2022_PC	Qin 2014_LD	Franzosa 2018_CD	He 2017_CD	Forslund 2015_CD
Veillonella parvula [r_01938]	√		√		√	√
Veillonella atypica [r_01941]		√		√	√
Streptococcus parasanguinis [r_00312]			√		√
Megasphaera micronuciformis [r_11823]	√
Faecalibacterium prausnitzii [r_06110]		√		√		√
Faecalibacterium prausnitzii [r_06108]				√	√			√
Romboutsia timonensis [r_09389]		√	√		√
Bifidobacterium adolescentis [r_02703]
Coprococcus comes [r_03690]
[Eubacterium] rectale [r_03657]		√
Abbreviations: NKTCL, natural killer/T-cell lymphoma; ES, Spanish; DE, German; JP, Japan; LD, liver disease; CD, Crohn’s disease.

## Sheet: Table S3
Table S3. Participant characteristics at the time of faeces sampling.
	Discovery cohort			Validation cohort			All subjects (n=75)
	NKTCL (n=30)	HC (n=20)	P values	NKTCL (n=12)	HC (n=13)	P values	Discovery cohort (n=50)	Validation cohort (n=25)	P values
Gender Female Male	13 (43.3%) 17 (56.7%)	9 (45.0%) 11 (55.0%)	1	4 (33.3%) 8 (66.7%)	6 (46.2%) 7 (53.8%)	0.688168	22 (44.0%) 28 (56.0%)	10 (40.0%) 15 (60.0%)	0.81
Age median years (min-max)	43 (18-68)	39 (23-69)	0.519627	45 (20-73)	42 (23-72)	0.531157	42.5 (18-69)	45 (20-73)	0.44
BMI median kg/m2 (min-max)	22.97 (16.98-31.01)	22.27 (18.49-29.35)	0.789203	23.98 (19.47-30.43)	24.80 (19.58-27.63)	0.78565	22.58 (16.98-31.01)	24.80 (19.47-30.43)	0.1
Ever smoker No Yes	22 (73.3%) 8 (26.7%)	15 (75.0%) 5 (25.0%)	1	7 (58.3%) 5 (41.7%)	11 (84.6%) 2 (15.4%)	0.2	37 (74.0%) 13 (26.0%)	18 (72.0%) 7 (28.0%)	1
Ever drinking No Yes	28 (93.3%) 2 (6.7%)	19 (95.0%) 1 (5.0%)	1	10 (83.3%) 2 (16.7%)	12 (92.3%) 1 (7.7%)	0.59	47 (94.0%) 3 (6.0%)	22 (88.0%) 3 (12.0%)	0.39
Abbreviations: BMI, body mass index; NKTCL, natural killer/T-cell lymphoma; HC, healthy control. Continuous variables were compared using Wilcoxon rank sum test between groups. Fisher’s exact test compared categorical variables.

## Sheet: Table S4
Table S4. Summarized clinical features of patients with natural killer/T-cell lymphoma.
	Discovery cohort (n=30)	Validation cohort (n=12)
ECOG performance status 0~1 2~5	23 (76.7%) 7 (23.3%)	10 (83.3%) 2 (16.7%)
B symptoms Absence Presence	20 (66.7%) 10 (33.3%)	7 (58.3%) 5 (41.7%)
Stage I/II III/IV	18 (60.0%) 12 (40.0%)	7 (58.3%) 5 (41.7%)
LN involvement No Yes	19 (63.3%) 11 (36.7%)	8 (66.7%) 4 (33.3%)
PINK-E Low risk Intermediate risk High risk	17 (56.7%) 4 (13.3%) 9 (30.0%)	7 (58.3%) 2 (16.7%) 3 (25.0%)
EBV level Increased Normal	10 (33.3%) 20 (66.7%)	2 (16.7%) 10 (83.3%)
LDH level Increased Normal	10 (33.3%) 20 (66.7%)	5 (41.7%) 7 (58.3%)
BM involvement No Yes	28 (93.3%) 2 (6.7%)	12 (100%) 0
Ki67 >= 60% No Yes	9 (30.0%) 21 (70.0%)	2 (16.7%) 10 (83.3%)
Comorbidities Hypertension Diabetes Hepatitis B	1 (3.3%) 1 (3.3%) 2 (6.7%)	1 (8.3%) 0 0
Response R NR	20 (66.7%) 10 (33.3%)	NA
Abbreviations: ECOG, Eastern Cooperative Oncology Group ; LN, lymph node; PINK-E, Prognostic index for natural killer lymphoma-Epstein-Barr virus; EBV, Epstein-Barr virus; LDH, Lactate dehydrogenase; BM, bone marrow; R, response; NR, non-response; NA, not available.

## Sheet: Table S5
Table S5. The sequencing depth and meta-information of the samples we collected.
Sample_ID	Group	Cohort	Clean Reads	Clean Base	Read Length	Q20 (%)	GC (%)	Gender	Age (years)	Height (cm)	Weight (Kg)	BMI (Kg/m2)	Smoking	Drinking	Comorbidities	ECOG PS >= 2	B symptoms	Stage	LN involvement	PINK-E	EBV level	LDH level	BM involvement	Evaluation	Response	OS	PFS	Status	Ki67 >= 60%
NKT1	NKTCL	Discovery	72101808	10815271200	150;150	96.84	50.8	Female	62	153	60	25.6312	no	no	no	no	no	I	no	L	normal	normal	no	CR	R	36	36	Alive	yes
NKT2	NKTCL	Discovery	69905730	10485859500	150;150	96.98	41.96	Female	29	155	55	22.8928	no	no	hepatitis B	yes	yes	IV	yes	H	increase	increase	yes	PD	NR	4	1	Dead	yes
NKT3	NKTCL	Discovery	72720328	10908049200	150;150	97.51	42.83	Male	36	170	55	19.0311	no	no	no	yes	yes	IV	yes	H	increase	increase	no	PD	NR	2	2	Dead	yes
NKT4	NKTCL	Discovery	72655564	10898334600	150;150	96.89	44.35	Male	53	178	87	27.4587	no	no	no	no	no	II	no	L	normal	normal	no	CR	R	34	34	Alive	yes
NKT5	NKTCL	Discovery	72898572	10934785800	150;150	96.87	45.66	Female	55	154	48.4	20.4082	no	no	no	no	yes	II	no	L	normal	normal	no	CR	R	34	34	Alive	yes
NKT6	NKTCL	Discovery	73818628	11072794200	150;150	96.58	47.77	Female	68	150	51	22.6667	no	no	no	yes	yes	IV	yes	H	normal	normal	no	CR	R	33.5	33.5	Alive	yes
NKT7	NKTCL	Discovery	70311114	10546667100	150;150	96.56	42.93	Male	45	167	78	27.968	yes	no	hypertension	no	no	I	no	L	normal	normal	no	CR	R	32.5	32.5	Alive	no
NKT8	NKTCL	Discovery	67790994	10168649100	150;150	96.83	45.07	Female	52	163	65	24.4646	no	no	no	no	yes	IV	yes	H	increase	increase	no	PD	NR	1	1	Dead	yes
NKT9	NKTCL	Discovery	73059336	10958900400	150;150	97.35	39.63	Male	22	170	65	22.4913	yes	no	no	no	no	II	no	L	increase	normal	no	PD	NR	32.5	2	Alive	no
NKT10	NKTCL	Discovery	71619828	10742974200	150;150	96.67	43.82	Male	49	170	89	30.7958	yes	yes	no	no	no	III	yes	H	increase	normal	no	PD	NR	22.5	2	Dead	no
NKT11	NKTCL	Discovery	72671638	10900745700	150;150	95.85	44.02	Female	43	158	63	25.2363	no	no	no	no	no	IV	yes	H	normal	increase	no	CR	R	30	30	Alive	yes
NKT12	NKTCL	Discovery	71071258	10660688700	150;150	96.87	42.71	Male	53	171	65	22.2291	yes	yes	no	no	no	II	no	L	normal	normal	no	CR	R	30	30	Alive	yes
NKT13	NKTCL	Discovery	71676242	10751436300	150;150	97.53	44.73	Male	62	170	71.1	24.6021	no	no	no	no	no	I	no	L	normal	normal	no	CR	R	30	30	Alive	yes
NKT14	NKTCL	Discovery	72555344	10883301600	150;150	96.92	43.2	Male	43	170	80	27.6817	yes	no	no	no	no	I	no	L	normal	normal	no	CR	R	29	29	Alive	no
NKT15	NKTCL	Discovery	72689750	10903462500	150;150	97.22	44.5	Female	67	156	48.2	19.806	no	no	hepatitis B	no	no	II	no	H	increase	normal	no	PR	R	29	29	Alive	no
NKT16	NKTCL	Discovery	71883402	10782510300	150;150	97.32	44.01	Female	35	159	60	23.7332	no	no	no	no	no	I	no	L	normal	normal	no	CR	R	28	28	Dead	yes
NKT17	NKTCL	Discovery	72580216	10887032400	150;150	97.34	42.43	Male	33	165	75	27.5482	yes	no	no	no	no	IV	yes	I	normal	increase	no	PD	NR	21	4	Dead	yes
NKT18	NKTCL	Discovery	71714878	10757231700	150;150	97.08	44.3	Female	43	160	55	21.4844	no	no	no	no	no	II	no	L	normal	normal	no	PR	R	21.5	21.5	Alive	no
NKT19	NKTCL	Discovery	73227246	10984086900	150;150	97.07	43.95	Male	55	173	61	20.3816	no	no	no	no	no	II	no	L	normal	normal	no	CR	R	21	21	Alive	no
NKT20	NKTCL	Discovery	71824884	10773732600	150;150	96.78	44.01	Male	61	174	55	18.1662	yes	no	diabetes	no	no	IV	yes	H	normal	increase	no	PD	NR	1.5	1.5	Dead	yes
NKT21	NKTCL	Discovery	71473986	10721097900	150;150	96.74	44.31	Male	19	184	105	31.0137	no	no	no	no	yes	II	no	L	normal	increase	no	PD	NR	19.5	3	Alive	no
NKT22	NKTCL	Discovery	71014026	10652103900	150;150	97.02	45.42	Male	40	170	72	24.9135	no	no	no	no	no	III	yes	I	normal	normal	no	PD	NR	17.5	4	Alive	no
NKT23	NKTCL	Discovery	71977516	10796627400	150;150	96.23	44.58	Female	23	162	55	20.9572	no	no	no	yes	yes	IV	yes	H	increase	increase	yes	PD	NR	0	0	Dead	yes
NKT24	NKTCL	Discovery	72226912	10834036800	150;150	96.92	45.6	Male	57	173	77	25.7276	no	no	no	no	no	II	no	L	nomal	normal	no	PR	R	16	16	Alive	yes
NKT25	NKTCL	Discovery	72178508	10826776200	150;150	96.81	44.13	Female	34	155	50	20.8117	no	no	no	no	no	I	no	L	nomal	normal	no	CR	R	16.5	16.5	Alive	yes
NKT26	NKTCL	Discovery	71931194	10789679100	150;150	96.76	42.73	Male	38	178	80	25.2493	no	no	no	yes	yes	I	no	L	normal	normal	no	CR	R	15.5	15.5	Alive	yes
NKT27	NKTCL	Discovery	71792226	10768833900	150;150	96.41	46.27	Male	53	178	73	23.04	yes	no	no	yes	yes	IV	no	I	increase	increase	no	CR	R	14	14	Alive	yes
NKT28	NKTCL	Discovery	70780180	10617027000	150;150	96.58	43.66	Female	34	180	70	21.6049	no	no	no	no	no	II	no	L	increase	normal	no	CR	R	13	13	Dead	yes
NKT29	NKTCL	Discovery	70829364	10624404600	150;150	96.94	42.38	Female	21	163	51.2	19.2706	no	no	no	no	no	I	no	L	normal	normal	no	CR	R	13	13	Alive	yes
NKT30	NKTCL	Discovery	72323580	10848537000	150;150	96.51	46.2	Male	18	180	55	16.9753	no	no	no	yes	yes	IV	yes	I	increase	increase	no	PR	R	13.5	6	Alive	yes
NKT31	NKTCL	Validation	40299913	12089973900	150;150	96.06	46.94	Female	46	163	57	21.4536	no	no	no	no	no	II	no	L	normal	increase	no	NA	NA	NA	NA	NA	yes
NKT32	NKTCL	Validation	40098288	12029486400	150;150	95.78	46.32	Male	72	172	75	25.3515	yes	yes	no	no	yes	II	no	L	normal	normal	no	NA	NA	NA	NA	NA	yes
NKT33	NKTCL	Validation	40124088	12037226400	150;150	97.3	45.55	Male	20	165	60	22.0386	yes	no	no	no	yes	III	yes	H	increase	increase	no	NA	NA	NA	NA	NA	yes
NKT34	NKTCL	Validation	33855290	10156587000	150;150	96.69	45.42	Female	26	172	65	21.9713	no	no	no	no	no	I	no	L	normal	normal	no	NA	NA	NA	NA	NA	no
NKT35	NKTCL	Validation	40147189	12044156700	150;150	96.75	49.85	Male	73	166	63	22.8625	no	no	no	yes	no	IV	yes	H	normal	increase	no	NA	NA	NA	NA	NA	no
NKT36	NKTCL	Validation	40215458	12064637400	150;150	97.45	43.84	Male	45	167	70	25.0995	no	no	no	no	yes	II	no	L	normal	normal	no	NA	NA	NA	NA	NA	yes
NKT37	NKTCL	Validation	40041776	12012532800	150;150	97.45	43.76	Male	44	169	80	28.0102	yes	no	no	yes	yes	IV	yes	H	increase	increase	no	NA	NA	NA	NA	NA	yes
NKT38	NKTCL	Validation	35823525	10747057500	150;150	97.14	42.69	Male	41	179	97.5	30.4298	yes	yes	hypertension	no	yes	II	no	L	normal	normal	no	NA	NA	NA	NA	NA	yes
NKT39	NKTCL	Validation	37532903	11259870900	150;150	97.32	43.18	Male	52	163	55	20.7008	yes	no	no	no	no	II	no	L	normal	normal	no	NA	NA	NA	NA	NA	yes
NKT40	NKTCL	Validation	40142507	12042752100	150;150	97.2	45.91	Female	44	157	48	19.4734	no	no	no	no	no	II	no	L	normal	increase	no	NA	NA	NA	NA	NA	yes
NKT41	NKTCL	Validation	40138010	12041403000	150;150	97.48	44.09	Female	45	160	70	27.3438	no	no	no	no	no	III	yes	I	normal	normal	no	NA	NA	NA	NA	NA	yes
NKT42	NKTCL	Validation	30045054	9013516200	150;150	95.8	42.91	Male	59	168	80	28.3447	no	no	no	no	no	III	no	I	normal	normal	no	NA	NA	NA	NA	NA	yes
HC1	HC	Discovery	73023016	10953452400	150;150	97.26	46.45	Male	66	163	72	27.0993	yes	no	no
HC2	HC	Discovery	71729286	10759392900	150;150	96.98	45.11	Female	48	165	60	22.0386	no	no	no
HC3	HC	Discovery	72234792	10835218800	150;150	97.27	43.55	Male	69	169	57	19.9573	no	no	no
HC4	HC	Discovery	71613728	10742059200	150;150	97.03	48.34	Female	37	172	61	20.6193	no	no	no
HC5	HC	Discovery	71159618	10673942700	150;150	96.94	44.31	Female	49	160	65	25.3906	no	no	no
HC6	HC	Discovery	72266890	10840033500	150;150	96.26	45.29	Female	28	153	60	25.6312	no	no	no
HC7	HC	Discovery	72001074	10800161100	150;150	97.16	43.08	Male	35	166	59	21.4109	yes	no	no
HC8	HC	Discovery	71393692	10709053800	150;150	96.68	48.05	Female	45	150	59	26.2222	no	no	no
HC9	HC	Discovery	73172116	10975817400	150;150	96.25	41.29	Male	42	178	93	29.3524	no	yes	no
HC10	HC	Discovery	71199980	10679997000	150;150	96.09	46.46	Male	41	173	65	21.7181	yes	no	no
HC11	HC	Discovery	71940016	10791002400	150;150	96.04	45.22	Female	32	161	58	22.3757	no	no	no
HC12	HC	Discovery	72540512	10881076800	150;150	96.1	44.02	Male	57	165	70	25.7117	no	no	no
HC13	HC	Discovery	71569920	10735488000	150;150	96.51	45.31	Male	25	168	58	20.5499	no	no	no
HC14	HC	Discovery	72174388	10826158200	150;150	96.88	45.67	Male	24	171	61	20.8611	yes	no	no
HC15	HC	Discovery	72127442	10819116300	150;150	96.86	44.17	Female	49	157	55	22.3133	no	no	no
HC16	HC	Discovery	71634826	10745223900	150;150	96.2	47.3	Female	67	160	67	26.1719	no	no	no
HC17	HC	Discovery	71509096	10726364400	150;150	96.71	42.94	Female	31	156	45	18.4911	no	no	no
HC18	HC	Discovery	70660316	10599047400	150;150	95.71	44.37	Male	23	174	70	23.1206	no	no	no
HC19	HC	Discovery	71348810	10702321500	150;150	96.28	45	Male	26	167	62	22.231	yes	no	no
HC20	HC	Discovery	72165268	10824790200	150;150	96.38	44.96	Male	25	183	69	20.6038	no	no	no
HC21	HC	Validation	40192677	12057803100	150;150	97.34	40.56	Female	50	151	63	27.6304	no	no	no
HC22	HC	Validation	40177877	12053363100	150;150	97.2	45.28	Female	70	161	62	23.9188	no	no	no
HC23	HC	Validation	40042266	12012679800	150;150	97.3	44.85	Male	48	168	72	25.5102	yes	no	no
HC24	HC	Validation	40174465	12052339500	150;150	97.29	47.3	Female	72	158	62	24.8358	no	no	no
HC25	HC	Validation	40082823	12024846900	150;150	97	45.19	Female	51	159	68	26.8977	no	no	no
HC26	HC	Validation	40052145	12015643500	150;150	97.6	44.15	Female	42	163	60	22.5827	no	no	no
HC27	HC	Validation	40081760	12024528000	150;150	97.49	46.7	Female	39	164	66	24.539	no	no	no
HC28	HC	Validation	40208934	12062680200	150;150	97.57	43.94	Male	42	173	70	23.3887	yes	yes	no
HC29	HC	Validation	40143012	12042903600	150;150	96.79	43.89	Male	25	181	80	24.4193	no	no	no
HC30	HC	Validation	40118879	12035663700	150;150	96.92	44.83	Male	25	168	73	25.8645	no	no	no
HC31	HC	Validation	40126577	12037973100	150;150	97.42	44.2	Male	23	176.5	61	19.5813	no	no	no
HC32	HC	Validation	40032452	12009735600	150;150	96.89	43.1	Male	23	178	85	26.8274	no	no	no
HC33	HC	Validation	40021859	12006557700	150;150	96.86	44.92	Male	60	168	70	24.8016	no	no	no
	Abbreviations: NKTCL, natural killer/T-cell lymphoma; HC, healthy control; Q20 (%): Proportion of Q20; GC (%): Proportion of GC; BMI, body mass index; ECOG PS, Eastern Cooperative Oncology Group performance status; LN, lymph node; PINK-E, Prognostic index for natural killer lymphoma-Epstein-Barr virus; L: low risk, I: intermediate risk, H: high risk; EBV, Epstein-Barr virus; LDH, Lactate dehydrog…

## Sheet: Table S6
Table S6. CD as an example to demonstrate how the FPRs were calculated.
	No. of patients	No. of wrongly classified patients	FPR
He 2017_CD	49	36	0.735
Franzosa 2018_CD	88	27	0.307
Forslund 2015_CD	86	18	0.209
Price Lloyd 2016_CD	151	13	0.0861
average CD	374	94	0.251
Abbreviations: CD, Crohn’s disease; FPRs, False positive rates.

## Sheet: Table S7
Table S7. Evaluations of the prognostic value of the shared species to the survival of NKTCL patients.
	P value (OS)	P value (PFS)
Veillonella parvula [r_01938]	0.065	0.07
Veillonella atypica [r_01941]	0.019	0.1
Streptococcus parasanguinis [r_00312]	0.014	0.0057
Megasphaera micronuciformis [r_11823]	0.13	0.15
Faecalibacterium prausnitzii [r_06110]	0.37	0.17
Faecalibacterium prausnitzii [r_06108]	0.047	0.016
Romboutsia timonensis [r_09389]	0.0052	0.0039
Bifidobacterium adolescentis [r_02703]	0.25	0.16
Coprococcus comes [r_03690]	0.2	0.1
[Eubacterium] rectale [r_03657]	0.15	0.1
Veillonella parvula [r_01938]/Faecalibacterium prausnitzii [r_06110]	0.15	0.056
Veillonella parvula [r_01938]/Faecalibacterium prausnitzii [r_06108]	0.047	0.007
Veillonella parvula [r_01938]/Romboutsia timonensis [r_09389]	<0.0001	0.00023
Veillonella parvula [r_01938]/Bifidobacterium adolescentis [r_02703]	0.14	0.045
Veillonella parvula [r_01938]/Coprococcus comes [r_03690]	0.26	0.1
Veillonella parvula [r_01938]/[Eubacterium] rectale [r_03657]	0.17	0.07
Veillonella atypica [r_01941]/Faecalibacterium prausnitzii [r_06110]	0.17	0.04
Veillonella atypica [r_01941]/Faecalibacterium prausnitzii [r_06108]	0.05	0.052
Veillonella atypica [r_01941]/Romboutsia timonensis [r_09389]	<0.0001	0.00037
Veillonella atypica [r_01941]/Bifidobacterium adolescentis [r_02703]	0.2	0.12
Veillonella atypica [r_01941]/Coprococcus comes [r_03690]	0.12	0.062
Veillonella atypica [r_01941]/[Eubacterium] rectale [r_03657]	0.11	0.058
Streptococcus parasanguinis [r_00312]/Faecalibacterium prausnitzii [r_06110]	0.24	0.051
Streptococcus parasanguinis [r_00312]/Faecalibacterium prausnitzii [r_06108]	0.062	0.1
Streptococcus parasanguinis [r_00312]/Romboutsia timonensis [r_09389]	<0.0001	<0.0001
Streptococcus parasanguinis [r_00312]/Bifidobacterium adolescentis [r_02703]	0.063	0.029
Streptococcus parasanguinis [r_00312]/Coprococcus comes [r_03690]	0.063	0.029
Streptococcus parasanguinis [r_00312]/[Eubacterium] rectale [r_03657]	0.37	0.21
Megasphaera micronuciformis [r_11823]/Faecalibacterium prausnitzii [r_06110]	0.11	0.031
Megasphaera micronuciformis [r_11823]/Faecalibacterium prausnitzii [r_06108]	0.11	0.052
Megasphaera micronuciformis [r_11823]/Romboutsia timonensis [r_09389]	<0.0001	0.00037
Megasphaera micronuciformis [r_11823]/Bifidobacterium adolescentis [r_02703]	0.044	0.3
Megasphaera micronuciformis [r_11823]/Coprococcus comes [r_03690]	0.044	0.18
Megasphaera micronuciformis [r_11823]/[Eubacterium] rectale [r_03657]	0.11	0.052
Abbreviations: NKTCL, natural killer/T-cell lymphoma; OS, overall survival; PFS, progression free survival.
